# Supplementary material
Source: PubMed Central journal article supplement (PMC4836910)
Supplement: NIHMS777319-supplement-Supp_Text.pdf [file NIHMS777319-supplement-Supp_Text.pdf]

1 **Online-only Material**

2 **Online only methods**

3 **Online only references**

4 **eTable 1:** Statistical analysis of CSF CXCL13 in initial and follow-up samples of patients  
5 with anti-NMDAR encephalitis

6 **eFigure 1:** Serum concentration of CXCL13 is not different between anti-NMDAR  
7 encephalitis and controls

8 **eFigure 2:** CSF CXCL13 does not correlate with CSF titer of NMDAR antibodies.

9 **eFigure 3:** Perivascular macrophages and activated microglia express CXCL13

10

11

12

1 **Online only methods**

2 Immunohistochemistry of human biopsy samples

3 Formalin-fixed, paraffin-embedded tissue sections (3-4 $\mu$ m thick) from right frontal biopsy  
4 material of a patient with anti-NMDAR encephalitis (case #5<sup>1</sup>) were deparaffinized and the  
5 antigen retrieved as reported. Sections were then serially incubated with 0.3% hydrogen  
6 peroxide for 15 minutes at room temperature, 10% horse serum in PBS for 1h, and the  
7 primary antibody overnight at 4°C. The following primary antibodies were used: polyclonal  
8 (goat) antibody CXCL13 (1:15; R&D System, Minneapolis, USA), CD68 (1:5000; activated  
9 microglia/macrophages, DAKO, Glostrup, Denmark), CD138 (1:50; plasma cells,  
10 plasmablasts, DAKO, Glostrup, Denmark), CD3 (1:100; Leica, Bannockburn, IL), CD8 (1:20;  
11 DAKO), CD4 (1:20; Biocare, Concord, CA), and CD20 (1:250; DAKO). The next day,  
12 sections were incubated with the appropriate secondary antibody (1:1000) for 1h at room  
13 temperature (Vector lab, Burlingame, CA, USA), avidin-biotin-peroxidase for 40 minutes,  
14 and visualized with diaminobenzidine (DAB) (Vector lab). Sections were then counterstained  
15 with Mayer's hematoxylin.

16

17 **Online-only references:**

18 1. Martinez-Hernandez E, Horvath J, Shiloh-Malawsky Y, Sangha N, Martinez-Lage M,  
19 Dalmau J. Analysis of complement and plasma cells in the brain of patients with anti-  
20 NMDAR encephalitis. *Neurology*. 2011;77(6):589–593.

21

1 eTable 1: Statistical analysis of CSF CXCL13 in initial and follow-up samples of patients  
 2 with anti-NMDAR encephalitis

| All patients n=167 first available sample |              |                          |                                    |                                   |                 |
|-------------------------------------------|--------------|--------------------------|------------------------------------|-----------------------------------|-----------------|
| General linear model                      |              |                          | Post-hoc testing                   |                                   |                 |
|                                           | P-value      | Effect size <sup>o</sup> | Group                              | Mean <sup>&amp;</sup> (95% CI), n | P-Value         |
| Corrected model                           | <b>0.001</b> | 0.241                    |                                    |                                   |                 |
| Age                                       | <b>0.005</b> | 0.062                    |                                    |                                   |                 |
| Gender                                    | 0.914        | 0.000                    |                                    |                                   |                 |
| Maximum mRS 5                             | 0.811        | 0.000                    |                                    |                                   |                 |
| Onset-to-sample time                      | <b>0.004</b> | 0.065                    | months 1-2 <sup>¥</sup>            | 14.9pg/ml (10.6-21.0) n=113       |                 |
|                                           |              |                          | months 3-4 <sup>¥</sup>            | 4.4pg/ml (2.0-9.7) n=21           | <b>p=0.017</b>  |
|                                           |              |                          | months 5-12 <sup>¥</sup>           | 3.5pg/ml (1.9-6.7) n=33           | <b>p=0.0003</b> |
| Prodromal symptoms                        | <b>0.011</b> | 0.051                    | prodrome <sup>#</sup>              | 20.3pg/ml (12.5-33.0) n=67        | n/a             |
|                                           |              |                          | no prodrome <sup>#</sup>           | 10.0pg/ml (6.2-16.0) n=44         |                 |
| MRI abnormal                              | 0.448        | 0.005                    |                                    |                                   |                 |
| CSF abnormal                              | 0.117        | 0.020                    |                                    |                                   |                 |
| Stay in ICU                               | 0.398        | 0.006                    |                                    |                                   |                 |
| Tumor found                               | 0.104        | 0.021                    |                                    |                                   |                 |
| Prior immunosuppression <sup>§</sup>      | 0.302        | 0.009                    |                                    |                                   |                 |
| Interaction Prodrome * Tumor              | <b>0.039</b> | 0.034                    | no tumor, prodrome <sup>#</sup>    | 16.9pg/ml (9.9-28.9) n=56         | p=1.0           |
|                                           |              |                          | no tumor, no prodrome <sup>#</sup> | 11.0pg/ml (6.6-18.4) n=36         |                 |
|                                           |              |                          | tumor, prodrome <sup>#</sup>       | 26.2pg/ml (9.7-70.5) n=20         |                 |
|                                           |              |                          | tumor, no prodrome <sup>#</sup>    | 6.4pg/ml (1.7-24.4) n=8           | p=0.45          |

  

| Patients treated within 90 days of onset n=137 first available sample |              |                          |                                |                               |         |
|-----------------------------------------------------------------------|--------------|--------------------------|--------------------------------|-------------------------------|---------|
| General linear model                                                  |              |                          | Group means                    |                               |         |
|                                                                       | P-value      | Effect size <sup>o</sup> | Group                          | Mean (95% CI), n              | P-Value |
| Limited response at 8 months                                          | <b>0.003</b> | 0.078                    | Limited response at 8 months   | 16.4 pg/ml (10.0-26.8), n=57  | n/a     |
|                                                                       |              |                          | Favorable response at 8 months | 8.6 pg/ml (CI 5.6-13.1), n=80 |         |

  

| Monophasic patients treated within 90 days from onset and follow-up samples available n=35 |                                   |                  |                               |                                   |                                     |                                            |
|--------------------------------------------------------------------------------------------|-----------------------------------|------------------|-------------------------------|-----------------------------------|-------------------------------------|--------------------------------------------|
| Two-way ANOVA                                                                              |                                   |                  | Post-hoc testing <sup>@</sup> |                                   |                                     |                                            |
| Variable                                                                                   | Source of variation               | P-value          | Months after treatment        | Limited response, mean [95% CI],n | Favorable response, mean [95% CI],n | Multiplicity-adjusted p-value <sup>@</sup> |
| CSF CXCL13 in pg/ml in initial and follow-up samples n=35                                  | Months after treatment initiation | <b>&lt;0.001</b> | 1-2 months                    | 24.7 [5.98-101.8],13              | 9.00 [2.37-34.1],13                 | 0.23                                       |
|                                                                                            | Response to therapy               | <b>0.003</b>     | 3-6 months                    | 12.7 [4.43-36.11],15              | 1.69 [0.99-2.88],13                 | <b>0.019</b>                               |
|                                                                                            | Interaction                       | 0.36             | > 6 months                    | 1.96 [1.09-3.53],18               | 1 [1-1],9                           | 0.32                                       |

  

| Relapsing patients n=13                                   |              |                              |                 |                               |
|-----------------------------------------------------------|--------------|------------------------------|-----------------|-------------------------------|
| Kruskal-Wallis-Test                                       |              | Dunn's post-hoc testing      |                 |                               |
| Variable                                                  | P-value      | Variable                     | Mean rank diff. | Multiplicity-adjusted P-value |
| CSF CXCL13 in pg/ml in initial and follow-up samples n=13 | <b>0.004</b> | Initial vs. last sample      | 11.75           | <b>0.044</b>                  |
|                                                           |              | Remission versus last sample | 5.61            | 0.78                          |
|                                                           |              | Relapse versus last sample   | 11.5            | <b>0.027</b>                  |

3  
 4 <sup>&</sup>Logarithmical mean, recalculated after creation of the model leading to skewed 95% CI of  
 5 mean intervals. <sup>¥</sup>post hoc testing done using one-way ANOVA with Sidak-Holm post-hoc test  
 6 and multiplicity-adjusted p-values of difference to samples from months 1-2. <sup>#</sup>Post-hoc  
 7 testing done using unpaired t-tests and data from samples from months 1 and 2. <sup>§</sup>To correct  
 8 for effects of samples acquired before and after initiation of immunosuppression and allow for  
 9 the immunosuppressive effect on cytokine levels, any immunosuppressive treatment >14 days

1 before sample was included as a factor. °partial eta squared. \* Interaction analysis in  
2 univariate general linear model. @Post-hoc testing using Sidak-Holm procedure with  
3 multiplicity-adjusted p-values. ICU intensive care unit, n/a not applicable.

4

5

6

7

### Supplemental figure legends:

8 eFigure 1: Serum concentration of CXCL13 is not different between anti-NMDAR

9 encephalitis and controls

10 Serum CXCL13 levels of patients with anti-NMDAR encephalitis (NMDAR) are not  
11 significantly different from those of controls with non-inflammatory conditions (NID).

12 Data is presented as logarithmic mean and 95% CI. CXCL13 concentrations below 1pg/ml are  
13 depicted as negative (neg).

14

15 eFigure 2: CSF CXCL13 correlates with age but not with CSF titer of NMDAR antibodies.

16 **A)** CSF CXCL13 measured in samples from patients with anti-NMDAR encephalitis,  
17 showing patients' age in years at time of diagnosis. Samples obtained during months 1-2.

18 **B)** CSF CXCL13 concentration plotted against the CSF NMDAR antibody titer in the first  
19 available CSF sample of patients with monophasic anti-NMDAR encephalitis (n=30) shows  
20 lack of significant correlation.

21 Pearson  $R^2$  and significance p indicated. CSF CXCL13 concentrations below 1pg/ml are  
22 depicted as negative (neg).

23

24 eFigure 3: Perivascular macrophages and activated microglia express CXCL13

25 **A-B)** Brain biopsy of a patient with anti-NMDAR encephalitis showing perivascular  
26 infiltrates expressing CXCL13 (**A**, arrow heads); these infiltrates were mainly composed of  
27 monocytes and macrophages (**B**, arrow heads indicate CD68 expressing monocytes and

- 1 macrophages).
- 2 **C-D**) CXCL13 was also expressed by activated microglia in the brain parenchyma (**C**,
- 3 CXCL13, arrow head shows a microglial cell; **D**, CD68, arrow heads show microglial cells).
- 4 No complement deposition was observed (Case #5<sup>1</sup>). Scale bar A-B 14  $\mu\text{m}$ , C-D 10  $\mu\text{m}$ .
- 5
- 6
